# Supplementary material
Source: PubMed Central journal article supplement (PMC2996420)
Supplement: 1015128107_pnas.201015128SI.pdf [file 1015128107_pnas.201015128SI.pdf]

# Supporting Information

Swanson and Bota 10.1073/pnas.1015128107

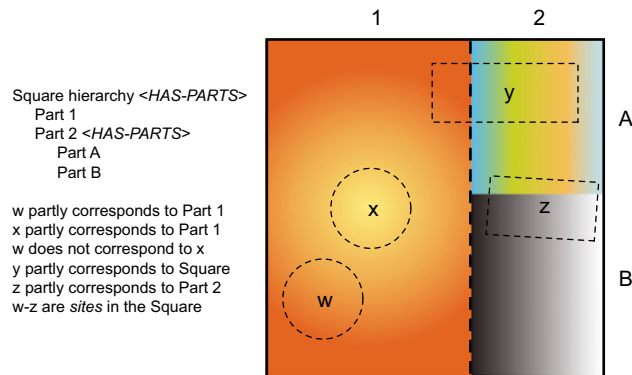

**Fig. S1.** Difference between *PART-OF* and *partly corresponding* relationships. In a hypothetical foundational model, the square (*Right*) is divided into parts 1 and 2, and part 2 is subdivided into parts A and B. This is a classic spatial hierarchy that for the sake of illustration is taken as complete, with an obvious set of *PART-OF* relationships (and the inverse *HAS-PART* relationships) (*Left*). Note that each of the four standard parts is heterogeneous, as is generally true for topographic divisions, gray matter regions, and white matter tracts of the nervous system (Fig. 1). There are four other outlines (w–z) in the foundational model square and they *partly correspond* in different ways (*Left*) to the standard parts. Partly corresponding terms are a special, separate category. Each partly corresponding term is associated with the hierarchy standard term immediately above it (*Left*) but the partly corresponding term is not an integral feature of the hierarchy because its border is considered arbitrary relative to the parts borders. In addition, sites w and x are topologically *included* in part 1, whereas sites y and z topologically *overlap* two adjacent parts. Because each standard part is heterogeneous, different sites within a particular part (in this example, sites w and x) are different. Outlines w–z are instances of *sites* [see main text and *SI Text* for Foundational Model of Connectivity (FMC) controlled vocabularies for definition of *site*].

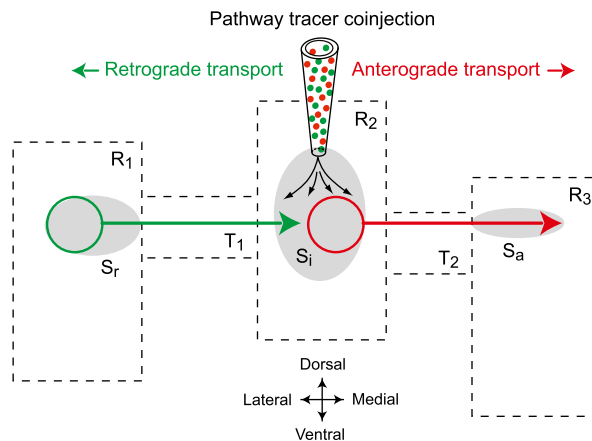

**Fig. S2.** Difference between connection and pathway. Basic terms for describing the results of experimental connection analysis experiments are contrasted with the FMC conceptual framework. The results of a single experiment, here the coinjection of an anterograde tracer and a retrograde tracer, demonstrate labeled pathways, which are the labeled parts of connections between nodes. Conceptually, region 1 ( $R_1$ ) connects through tract 1 ( $T_1$ ) with region 2 ( $R_2$ ) that in turn connects through tract 2 ( $T_2$ ) with region 3 ( $R_3$ ). Experimentally, the tracer coinjection site ( $S_i$ ) is centered in the middle of  $R_2$  and generates a retrograde labeling site ( $S_r$ ) in the dorsal half of  $R_1$  and an anterogradely labeled pathway (red) runs near the dorsal edge of  $T_2$ . It is critical to realize that in this example, macroconnections, not mesoconnections, are demonstrated; that is, connections between regions (treated as black boxes), not neuron types, are inferred (Fig. 6B). This figure is a bridge between the FMC proposed here and a consideration of experimental connective methodology and its application to the FMC.

## Nervous System Structural Elements

### Topographic macroarchitecture (gross anatomy)

|                                              |  |
|----------------------------------------------|--|
| Topographic divisions                        |  |
| Nerve net                                    |  |
| Marginal ganglia                             |  |
| Nerve ring                                   |  |
| Circumoral nerve ring                        |  |
| Radial nerve cord                            |  |
| Central nervous system                       |  |
| Central nerve cord                           |  |
| Central nerve cord trunk                     |  |
| Central longitudinal communicating branch    |  |
| Central transverse communicating branch      |  |
| Central ganglia                              |  |
| Invertebrate brain                           |  |
| Supraesophageal ganglion                     |  |
| Ventral ganglia                              |  |
| Circumenteric nerve ring                     |  |
| Cerebrospinal axis                           |  |
| Vertebrate brain                             |  |
| Forebrain                                    |  |
| Endbrain                                     |  |
| Cerebral cortex                              |  |
| Cerebral nuclei                              |  |
| Interbrain                                   |  |
| Thalamus                                     |  |
| Hypothalamus                                 |  |
| Midbrain                                     |  |
| Tectum                                       |  |
| Tegmentum                                    |  |
| Rhombicbrain                                 |  |
| Hindbrain                                    |  |
| Pons                                         |  |
| Cerebellum                                   |  |
| Medulla                                      |  |
| Spinal cord                                  |  |
| Peripheral Nervous System                    |  |
| Peripheral nerve cord                        |  |
| Peripheral nerve cord trunk                  |  |
| Peripheral longitudinal communicating branch |  |
| Nerves                                       |  |
| Invertebrate nerves                          |  |
| Craniospinal nerves (vertebrate)             |  |
| Cranial nerves                               |  |
| Spinal nerves                                |  |
| Spinal nerve roots                           |  |
| Spinal nerve trunk                           |  |
| Spinal nerve branches                        |  |
| Autonomic nerves (vertebrate)                |  |
| Paravertebral nerves                         |  |
| Prevertebral plexuses                        |  |
| Prevertebral nerves                          |  |
| Terminal plexuses                            |  |
| Terminal autonomic nerves                    |  |
| Peripheral Ganglia                           |  |
| Invertebrate peripheral ganglia              |  |
| Craniospinal ganglia (vertebrate)            |  |
| Cranial nerve ganglia                        |  |
| Spinal nerve ganglia                         |  |
| Autonomic ganglia (vertebrate)               |  |
| Paravertebral ganglia                        |  |
| Prevertebral ganglia                         |  |
| Terminal ganglia                             |  |
| Supporting elements                          |  |
| Meninges                                     |  |
| Dura                                         |  |
| Arachnoid                                    |  |
| Pia                                          |  |
| Ventricular-subarachnoid space               |  |
| Lateral ventricles                           |  |
| Third ventricle                              |  |
| Cerebral aqueduct                            |  |
| Fourth ventricle                             |  |
| Central canal                                |  |
| Subarachnoid space                           |  |

Fig. S3. Table of nervous system topographic macroarchitecture (gross anatomy), expanding on the lower levels of Fig. 1 (Left).

**A. Two amacrine neurons (nerve net)**

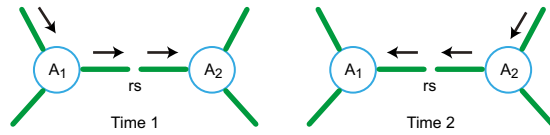

**B. Bipolar and unipolar neurons (invertebrate)**

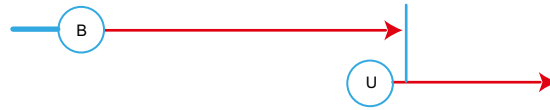

**C. Pseudounipolar and multipolar neurons (vertebrate)**

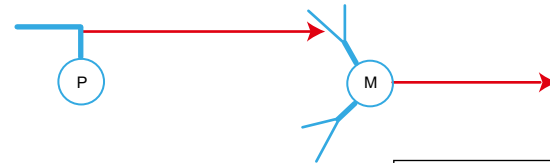

**D. Two multipolar neurons (vertebrate)**

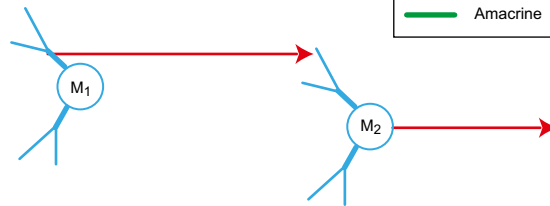

| KEY:                                 |           |
|--------------------------------------|-----------|
| <span style="color: blue;">—</span>  | Cell body |
| <span style="color: blue;">—</span>  | Dendrite  |
| <span style="color: red;">—</span>   | Axon      |
| <span style="color: green;">—</span> | Amacrine  |

**Fig. 54.** Some major neuron configurations. (A) Two amacrine neurons in a nerve net. (B) Bipolar and unipolar neurons in invertebrate. (C) Pseudounipolar neuron and multipolar neuron in vertebrate. (D) Two multipolar neurons in vertebrate.

**Other Supporting Information Files**

[SI Text \(DOC\)](#)
